# Supplementary material for: Perancangan interior full time training in Jakarta (FTTJ) di Bukit Sentul - Bogor
Source: Royal Society of Chemistry journal article supplement (doi:10.1039/c7nr00784a), 2003-01-01
Supplement: c7nr00784a1.pdf [file c7nr00784a1.pdf]

## Supporting Information

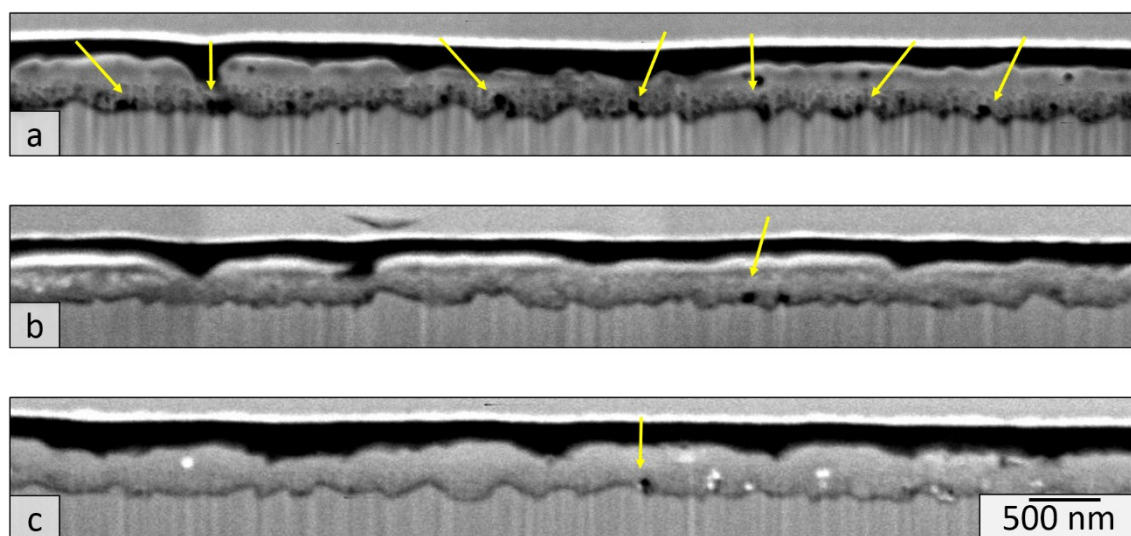

**Figure S1** SEM cross sectional views of fresh a), b) and stressed c) devices. The images were acquired from central a) and peripheral regions b), c).

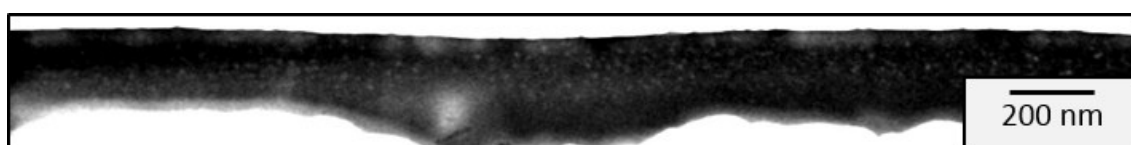

**Figure S2.** HAADF STEM image with increased contrast of the hole transport layer.

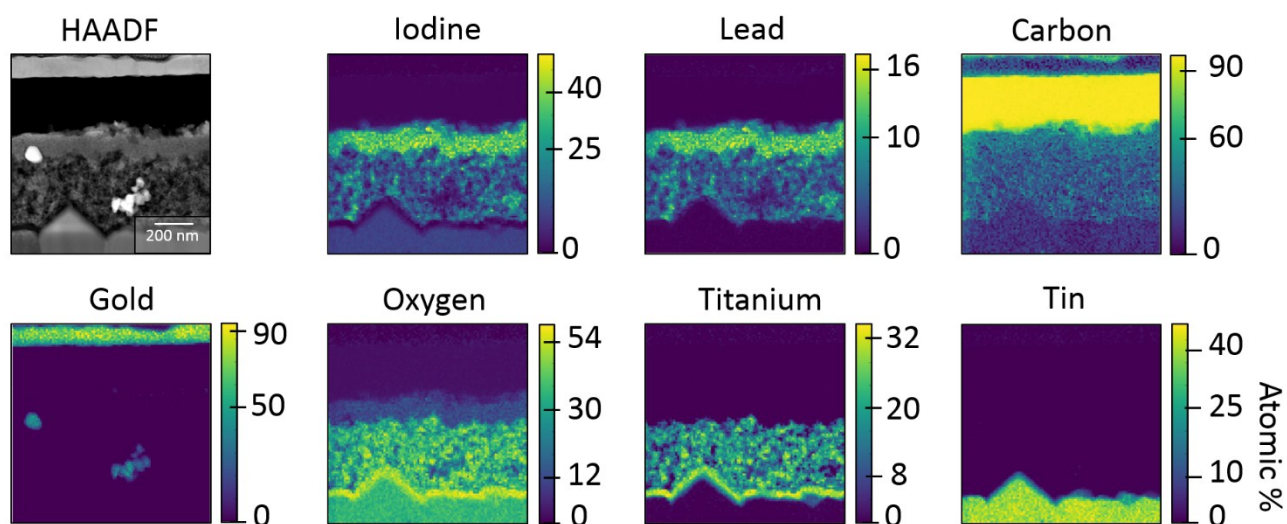

**Figure S3.** HAADF image and elemental quantitative EDX maps after 220 h light soaking for Iodine, Lead, Carbon, Gold, Oxygen, Titanium and Tin.

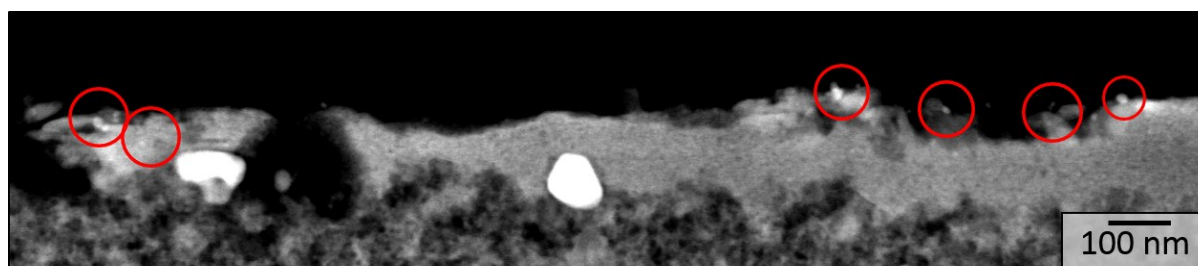

**Figure S4.** HAADF STEM image of a device after 220h light soaking test showing gold aggregates formation at the interface HTL/Perovskite (red circles).
